# Supplementary material for: Pectinases Secretion by Saccharomyces cerevisiae: Optimization in Solid-State Fermentation and Identification by a Shotgun Proteomics Approach
Source: MDPI journal article supplement (doi:10.3390/molecules27154981), 2022-08-05
Supplement: s1 [file s1]

# Pectinases Secretion by *Saccharomyces cerevisiae*: Optimization in Solid-State Fermentation and Identification by a Shotgun Proteomics Approach

Matheus Mikio Takeyama <sup>1</sup>, Márcia Corrêa de Carvalho <sup>1</sup>, Helena Sacco Carvalho <sup>2</sup>, Cristiane Rodrigues Silva <sup>1</sup>, Ana Paula Trovatti Uetanabaro <sup>3</sup>, Andrea Miura da Costa <sup>3</sup>, Joseph A. Medeiros Evaristo <sup>4</sup>, Fábio César Sousa Nogueira <sup>4,5</sup>, Ana Elizabeth Cavalcante Fai <sup>1,6</sup> and Maria Gabriela Bello Koblitz <sup>1,\*</sup>

- <sup>1</sup> Food and Nutrition Graduate Program (PPGAN), Federal University of the State of Rio de Janeiro (UNIRIO), Rio de Janeiro, RJ, Brazil; mikio\_m@hotmail.com (M.M.T.); marcia.feagri@gmail.com (M.C.d.C.); cristiane.silva@unirio.br (C.R.S.); bethfai@yahoo.com.br (A.E.C.F.)
- <sup>2</sup> Nutrition School, Federal University of the State of Rio de Janeiro (UNIRIO), Rio de Janeiro, RJ, Brazil; helenasacco@edu.unirio.br
- <sup>3</sup> Department of Biological Sciences, Santa Cruz State University (UESC), Ilhéus, BA, Brazil; aptuetanabaro@gmail.com (A.P.T.U.); amcosta@uesc.br (A.M.d.C.)
- <sup>4</sup> Laboratory of Proteomics/LADETEC, Institute of Chemistry, Federal University of Rio de Janeiro, RJ, Brazil; joseph.am.evaristo@gmail.com (J.A.M.E.); fabiocsn@iq.ufrj.br (F.C.S.N.)
- <sup>5</sup> Proteomics Unit, Institute of Chemistry, Federal University of Rio de Janeiro, RJ, Brazil
- <sup>6</sup> Department of Basic and Experimental Nutrition, Rio de Janeiro State University (UERJ), Rio de Janeiro, RJ, Brazil
- \* Correspondence: maria.koblitz@unirio.br; Tel./Fax: +55-21-2542-7236

**Table S1.** ANOVA for the influence of the tested variables on the secretion of total pectinolytic activity (U mL<sup>-1</sup>), by *S. cerevisiae* strain, according to the factorial design.

|             | square sum | degrees of freedom | quadratic mean | F           |
|-------------|------------|--------------------|----------------|-------------|
| regression  | 7.21       | 7                  | 1.03           | 28.47       |
| residue     | 0.43       | 12                 | 0.04           |             |
| lack of fit | 0.39       | 9                  |                | tabulated F |
| pure error  | 0.05       | 3                  |                | 5% = 2.91   |
| total       | 7.65       | 19                 |                |             |

$r^2 = 0.94$ .

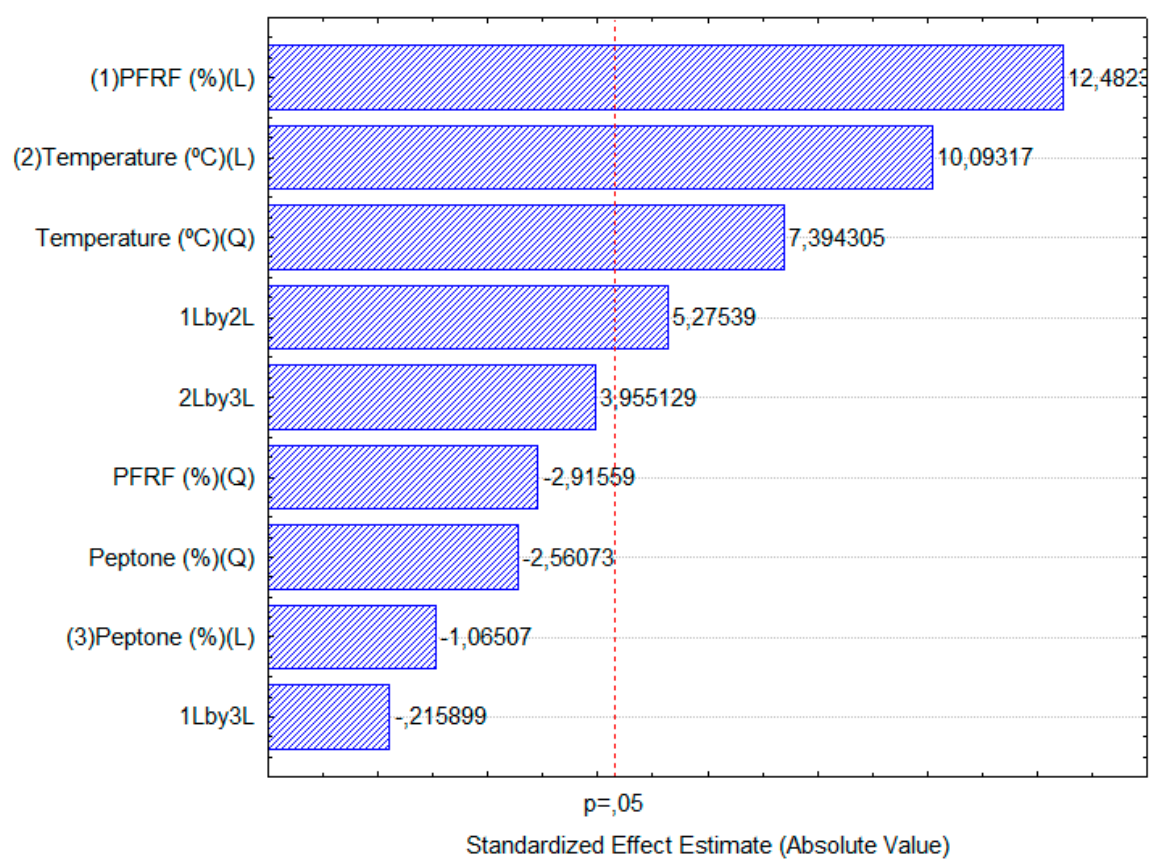

**Figure S1.** Pareto chart for the influence of the tested variables on the secretion of total pectinolytic activity ( $\text{U mL}^{-1}$ ) by *S. cerevisiae* strain, according to CCRD - 1.

**Table S2.** ANOVA for the influence of the tested variables on the secretion of total pectinolytic activity (U mL<sup>-1</sup>) by *S. cerevisiae* strain, according to CCRD - 1.

|             | <b>square sum</b> | <b>degrees of freedom</b> | <b>quadratic mean</b> | <b>F</b>    |
|-------------|-------------------|---------------------------|-----------------------|-------------|
| regression  | 36.38             | 4                         | 9.09                  | 5.73        |
| residue     | 19.03             | 12                        | 1.59                  |             |
| lack of fit | 18.83             | 10                        |                       | tabulated F |
| pure error  | 0.20              | 2                         |                       | 5% = 3.26   |
| total       | 55.41             | 16                        |                       |             |

$r^2 = 0.71$

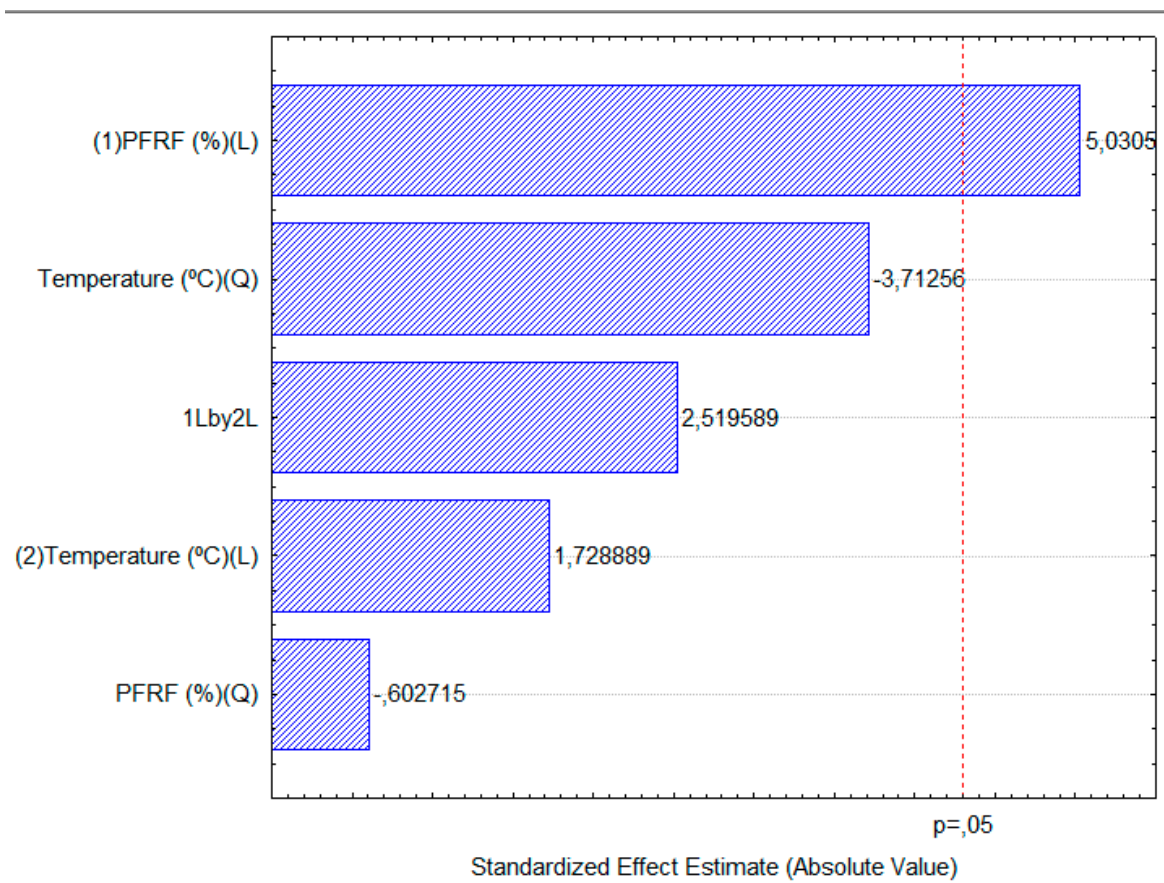

**Figure S2.** Pareto chart for the influence of the tested variables on the secretion of total pectinolytic activity ( $\text{U mL}^{-1}$ ) by *S. cerevisiae* strain, according to CCRD - 2.

**Table S3.** ANOVA for the influence of the tested variables on the secretion of total pectinolytic activity (U mL<sup>-1</sup>) by *S. cerevisiae* strain, according to CCRD - 2.

|             | <b>square sum</b> | <b>degrees of freedom</b> | <b>quadratic mean</b> | <b>F</b>    |
|-------------|-------------------|---------------------------|-----------------------|-------------|
| regression  | 38.14             | 5                         | 7.63                  | 6.80        |
| residue     | 5.61              | 5                         | 1.12                  |             |
| lack of fit | 4.04              | 3                         |                       | tabulated F |
| pure error  | 1.57              | 2                         |                       | 5% = 5,05   |
| total       | 43.75             | 10                        |                       |             |

$r^2 = 0.87$

**Table S4.** Matrix for CCRD - 2, total pectinolytic activity response and expected results by the model descriptive equation, after 24 h of fermentation by *S. cerevisiae* strain.

| Assay | PFRM (%) | Temperature (°C) | U mL <sup>-1</sup> (Observed) | U mL <sup>-1</sup> (Expected) |
|-------|----------|------------------|-------------------------------|-------------------------------|
| 1     | 12       | 15.5             | 0.86                          | 0.97                          |
| 2     | 12       | 32.5             | 0.80                          | 0.00                          |
| 3     | 52       | 15.5             | 0.86                          | 1.90                          |
| 4     | 52       | 32.5             | 5.26                          | 5.22                          |
| 5     | 4        | 24               | 0.31                          | 0.94                          |
| 6     | 60       | 24               | 6.06                          | 5.36                          |
| 7     | 32       | 12               | 0.86                          | 0.07                          |
| 8     | 32       | 36               | 0.86                          | 1.60                          |
| 9     | 32       | 24               | 4.42                          | 3.59                          |
| 10    | 32       | 24               | 3.70                          | 3.59                          |
| 11    | 32       | 24               | 2.66                          | 3.59                          |

**Table S5.** Matched proteins from *S. cerevisiae* database.

| Accession | Description                                                                                                                                                     |
|-----------|-----------------------------------------------------------------------------------------------------------------------------------------------------------------|
| P22943    | 12 kDa heat shock protein OS= <i>Saccharomyces cerevisiae</i> (strain ATCC 204508 / S288c) OX=559292 GN=HSP12 PE=1 SV=1                                         |
| P00358    | Glyceraldehyde-3-phosphate dehydrogenase 2 OS= <i>Saccharomyces cerevisiae</i> (strain ATCC 204508 / S288c) OX=559292 GN=TDH2 PE=1 SV=3                         |
| Q01855    | 40S ribosomal protein S15 OS= <i>Saccharomyces cerevisiae</i> (strain ATCC 204508 / S288c) OX=559292 GN=RPS15 PE=1 SV=1                                         |
| P53334    | Probable family 17 glucosidase SCW4 OS= <i>Saccharomyces cerevisiae</i> (strain ATCC 204508 / S288c) OX=559292 GN=SCW4 PE=1 SV=1                                |
| P46955    | Beta-glucosidase-like protein NCA3, mitochondrial OS= <i>Saccharomyces cerevisiae</i> (strain ATCC 204508 / S288c) OX=559292 GN=NCA3 PE=3 SV=1                  |
| P38248    | Cell wall protein ECM33 OS= <i>Saccharomyces cerevisiae</i> (strain ATCC 204508 / S288c) OX=559292 GN=ECM33 PE=1 SV=3                                           |
| P02994    | Elongation factor 1-alpha OS= <i>Saccharomyces cerevisiae</i> (strain ATCC 204508 / S288c) OX=559292 GN=TEF1 PE=1 SV=1                                          |
| P04911    | Histone H2A.1 OS= <i>Saccharomyces cerevisiae</i> (strain ATCC 204508 / S288c) OX=559292 GN=HTA1 PE=1 SV=2                                                      |
| P47001    | Cell wall mannoprotein CIS3 OS= <i>Saccharomyces cerevisiae</i> (strain ATCC 204508 / S288c) OX=559292 GN=CIS3 PE=1 SV=1                                        |
| P60010    | Actin OS= <i>Saccharomyces cerevisiae</i> (strain ATCC 204508 / S288c) OX=559292 GN=ACT1 PE=1 SV=1                                                              |
| Q08969    | Protein GRE1 OS= <i>Saccharomyces cerevisiae</i> (strain ATCC 204508 / S288c) OX=559292 GN=GRE1 PE=1 SV=1                                                       |
| Q12355    | Cell wall mannoprotein PST1 OS= <i>Saccharomyces cerevisiae</i> (strain ATCC 204508 / S288c) OX=559292 GN=PST1 PE=1 SV=1                                        |
| P05759    | Ubiquitin-40S ribosomal protein S31 OS= <i>Saccharomyces cerevisiae</i> (strain ATCC 204508 / S288c) OX=559292 GN=RPS31 PE=1 SV=3                               |
| P36135    | Probable secreted beta-glucosidase UTH1 OS= <i>Saccharomyces cerevisiae</i> (strain ATCC 204508 / S288c) OX=559292 GN=UTH1 PE=1 SV=2                            |
| P05737    | 60S ribosomal protein L7-A OS= <i>Saccharomyces cerevisiae</i> (strain ATCC 204508 / S288c) OX=559292 GN=RPL7A PE=1 SV=3                                        |
| P0CX46    | 60S ribosomal protein L2-B OS= <i>Saccharomyces cerevisiae</i> (strain ATCC 204508 / S288c) OX=559292 GN=RPL2B PE=1 SV=1                                        |
| P53301    | Probable glycosidase CRH1 OS= <i>Saccharomyces cerevisiae</i> (strain ATCC 204508 / S288c) OX=559292 GN=CRH1 PE=1 SV=1                                          |
| P22146    | 1,3-beta-glucanosyltransferase GAS1 OS= <i>Saccharomyces cerevisiae</i> (strain ATCC 204508 / S288c) OX=559292 GN=GAS1 PE=1 SV=2                                |
| P00044    | Cytochrome c iso-1 OS= <i>Saccharomyces cerevisiae</i> (strain ATCC 204508 / S288c) OX=559292 GN=CYC1 PE=1 SV=2                                                 |
| P00445    | Superoxide dismutase [Cu-Zn] OS= <i>Saccharomyces cerevisiae</i> (strain ATCC 204508 / S288c) OX=559292 GN=SOD1 PE=1 SV=2                                       |
| P32340    | Rotenone-insensitive NADH-ubiquinone oxidoreductase, mitochondrial OS= <i>Saccharomyces cerevisiae</i> (strain ATCC 204508 / S288c) OX=559292 GN=NDI1 PE=1 SV=1 |
| P15703    | Glucan 1,3-beta-glucosidase OS= <i>Saccharomyces cerevisiae</i> (strain ATCC 204508 / S288c) OX=559292 GN=BGL2 PE=1 SV=1                                        |
| P07280    | 40S ribosomal protein S19-A OS= <i>Saccharomyces cerevisiae</i> (strain ATCC 204508 / S288c) OX=559292 GN=RPS19A PE=1 SV=2                                      |
| P53629    | Sterol O-acyltransferase 2 OS= <i>Saccharomyces cerevisiae</i> (strain ATCC 204508 / S288c) OX=559292 GN=ARE2 PE=1 SV=1                                         |

|                          |                                                                                                                                    |
|--------------------------|------------------------------------------------------------------------------------------------------------------------------------|
| P00560                   | Phosphoglycerate kinase OS=Saccharomyces cerevisiae (strain ATCC 204508 / S288c) OX=559292 GN=PGK1 PE=1 SV=2                       |
| P05743                   | 60S ribosomal protein L26-A OS=Saccharomyces cerevisiae (strain ATCC 204508 / S288c) OX=559292 GN=RPL26A PE=1 SV=3                 |
| Q12692                   | Histone H2A.Z OS=Saccharomyces cerevisiae (strain ATCC 204508 / S288c) OX=559292 GN=HTZ1 PE=1 SV=3                                 |
| P04037                   | Cytochrome c oxidase subunit 4, mitochondrial OS=Saccharomyces cerevisiae (strain ATCC 204508 / S288c) OX=559292 GN=COX4 PE=1 SV=1 |
| P0CX83                   | 60S ribosomal protein L19-B OS=Saccharomyces cerevisiae (strain ATCC 204508 / S288c) OX=559292 GN=RPL19B PE=1 SV=1                 |
| P35997                   | 40S ribosomal protein S27-A OS=Saccharomyces cerevisiae (strain ATCC 204508 / S288c) OX=559292 GN=RPS27A PE=1 SV=1                 |
| P05750                   | 40S ribosomal protein S3 OS=Saccharomyces cerevisiae (strain ATCC 204508 / S288c) OX=559292 GN=RPS3 PE=1 SV=5                      |
| P40482                   | Protein transport protein SEC24 OS=Saccharomyces cerevisiae (strain ATCC 204508 / S288c) OX=559292 GN=SEC24 PE=1 SV=1              |
| P28319                   | Cell wall protein CWP1 OS=Saccharomyces cerevisiae (strain ATCC 204508 / S288c) OX=559292 GN=CWP1 PE=1 SV=2                        |
| P40212                   | 60S ribosomal protein L13-B OS=Saccharomyces cerevisiae (strain ATCC 204508 / S288c) OX=559292 GN=RPL13B PE=1 SV=1                 |
| P0CX26                   | 60S ribosomal protein L43-B OS=Saccharomyces cerevisiae (strain ATCC 204508 / S288c) OX=559292 GN=RPL43B PE=1 SV=1                 |
| P0CX30                   | 40S ribosomal protein S23-B OS=Saccharomyces cerevisiae (strain ATCC 204508 / S288c) OX=559292 GN=RPS23B PE=1 SV=1                 |
| P18239                   | ADP,ATP carrier protein 2 OS=Saccharomyces cerevisiae (strain ATCC 204508 / S288c) OX=559292 GN=PET9 PE=1 SV=2                     |
| P38616                   | Protein YGP1 OS=Saccharomyces cerevisiae (strain ATCC 204508 / S288c) OX=559292 GN=YGP1 PE=1 SV=2                                  |
| P52489                   | Pyruvate kinase 2 OS=Saccharomyces cerevisiae (strain ATCC 204508 / S288c) OX=559292 GN=PYK2 PE=1 SV=1                             |
| P23776                   | Glucan 1,3-beta-glucosidase I/II OS=Saccharomyces cerevisiae (strain ATCC 204508 / S288c) OX=559292 GN=EXG1 PE=1 SV=1              |
| P40472                   | Probable secreted beta-glucosidase SIM1 OS=Saccharomyces cerevisiae (strain ATCC 204508 / S288c) OX=559292 GN=SIM1 PE=1 SV=2       |
| P32836                   | GTP-binding nuclear protein GSP2/CNR2 OS=Saccharomyces cerevisiae (strain ATCC 204508 / S288c) OX=559292 GN=GSP2 PE=1 SV=1         |
| P40442                   | Putative uncharacterized protein YIL169C OS=Saccharomyces cerevisiae (strain ATCC 204508 / S288c) OX=559292 GN=YIL169C PE=3 SV=1   |
| P00761 SWISS-PROT:P00761 | Trypsin - Sus scrofa (Pig).                                                                                                        |
| O76013                   | SWISS-PROT:O76013 Keratin, type I cuticular HA6 (Hair keratin, type I HA6)                                                         |
| P28496                   | Sphingosine N-acyltransferase LAC1 OS=Saccharomyces cerevisiae (strain ATCC 204508 / S288c) OX=559292 GN=LAC1 PE=1 SV=2            |
| P0CX53                   | 60S ribosomal protein L12-A OS=Saccharomyces cerevisiae (strain ATCC 204508 / S288c) OX=559292 GN=RPL12A PE=1 SV=1                 |
| P39998                   | Enhancer of mRNA-decapping protein 3 OS=Saccharomyces cerevisiae (strain ATCC 204508 / S288c) OX=559292 GN=EDC3 PE=1 SV=1          |



**Table S6.** Matched proteins from pectinase database.

| Accession  | Description                                                                                                      |
|------------|------------------------------------------------------------------------------------------------------------------|
| A0A0G4N991 | Uncharacterized protein OS=Verticillium longisporum OX=100787 GN=BN1708_008936 PE=4 SV=1                         |
| A0A1Y2U259 | Glycoside hydrolase family 55 protein OS=Hypoxylon sp. EC38 OX=1001937 GN=K449DRAFT_410365 PE=4 SV=1             |
| A0A370JPG0 | Uncharacterized protein OS=Venturia inaequalis OX=5025 GN=Vi05172_g1685 PE=3 SV=1                                |
| A0A395GPQ8 | Pectin lyase-like protein (Fragment) OS=Aspergillus ibericus CBS 121593 OX=1448316 GN=BO80DRAFT_321211 PE=4 SV=1 |
| A0A0L1JA42 | Pectin lyase F OS=Aspergillus nomius NRRL 13137 OX=1509407 GN=ANOM_002499 PE=3 SV=1                              |
| A0A1V6V1X2 | Uncharacterized protein OS=Penicillium coprophilum OX=36646 GN=PENCOP_c002G06905 PE=4 SV=1                       |
| A0A1Y2DZG1 | Uncharacterized protein OS=Neocallimastix californiae OX=1754190 GN=LY90DRAFT_668057 PE=4 SV=1                   |
| A0A367IZ94 | Uncharacterized protein (Fragment) OS=Rhizopus stolonifer OX=4846 GN=CU098_001619 PE=3 SV=1                      |
| X8JKF7     | Pectate lyase OS=Rhizoctonia solani AG-3 Rhs1AP OX=1086054 GN=RSOL_437720 PE=4 SV=1                              |
| A0A2J6QBA4 | Glycoside hydrolase family 55 protein OS=Pezoloma ericae OX=1745343 GN=NA56DRAFT_643654 PE=4 SV=1                |
| A0A167AVW5 | Pectate lyase OS=Colletotrichum incanum OX=1573173 GN=CI238_10558 PE=4 SV=1                                      |
